# Supplementary material
Source: Royal Society of Chemistry journal article supplement (doi:10.1039/d5cp03688g)
Supplement: d5cp03688g1.pdf [file d5cp03688g1.pdf]

# Theoretical prediction of O-B<sub>2</sub>S<sub>2</sub> monolayer as two-dimensional sodium-ion battery anode material by first-principles calculations

Chunyi Feng<sup>a#</sup>, Linsong Gao<sup>b#</sup>, Xiongfei Yun<sup>b</sup>, Xiaoning Guan<sup>c</sup>, Changcheng Chen<sup>b\*</sup>, Gang Liu<sup>c\*</sup>, Pengfei Lu<sup>c,d\*</sup>

*a. State grid ningxia electric power co., ltd.*

*b. School of Science, Xi'an University of Architecture and Technology, Xi'an, 710055, China.*

*c. State Key Laboratory of Information Photonics and Optical Communications, Beijing University of Posts and Telecommunications, Beijing, 100876, China.*

*d. Ningbo Weiyuan Optoelectronic Research Institute Co.,Ltd.,Ningbo 315200, China.*

# The author's contribution to the work of this paper is equal.

Email: [chenchangcheng@xauat.edu.cn](mailto:chenchangcheng@xauat.edu.cn) (C. Chen), [liu\\_gang@bupt.edu.cn](mailto:liu_gang@bupt.edu.cn) (G. Liu), [photon.bupt@gmail.com](mailto:photon.bupt@gmail.com) (P. Lu).

Compositional convex hull of the B-S-O chemical system constructed from Materials Project reference data. Stable phases forming the convex hull are indicated by solid symbols. The proposed B<sub>2</sub>S<sub>2</sub>O phase (this work) is highlighted in red and is located above the convex hull, indicating thermodynamic metastability with respect to decomposition into B<sub>2</sub>O<sub>3</sub>, BS<sub>2</sub>, and S.

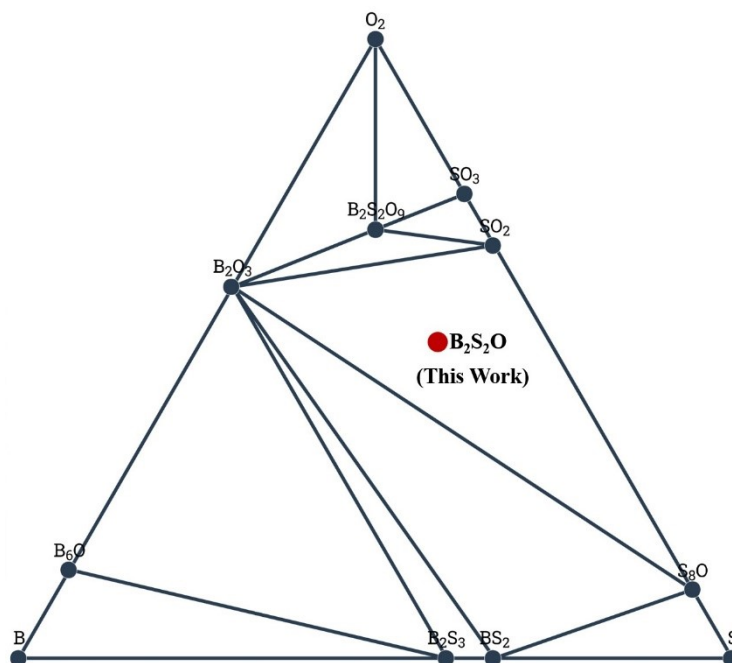

**Fig. S1** Convex-hull analysis illustrating the thermodynamic metastability of B<sub>2</sub>S<sub>2</sub>O in the ternary B-S-O chemical system.

Normalized formation energies of representative Na adsorption configurations as a function of Na content  $x$  in Na <sub>$x$</sub> -O-B<sub>2</sub>S<sub>2</sub>. The energies are normalized such that the endpoints at  $x = 0$  and  $x = 24$  are set to zero to

emphasize the relative stability trend upon Na insertion. Purple symbols denote the energies of representative optimized configurations at each Na concentration, while the blue solid line connects the lowest-energy configurations and serves as an approximate lower convex hull. This construction is used to illustrate the energetic landscape underlying the voltage profile, rather than a fully exhaustive enumeration of all possible Na orderings.

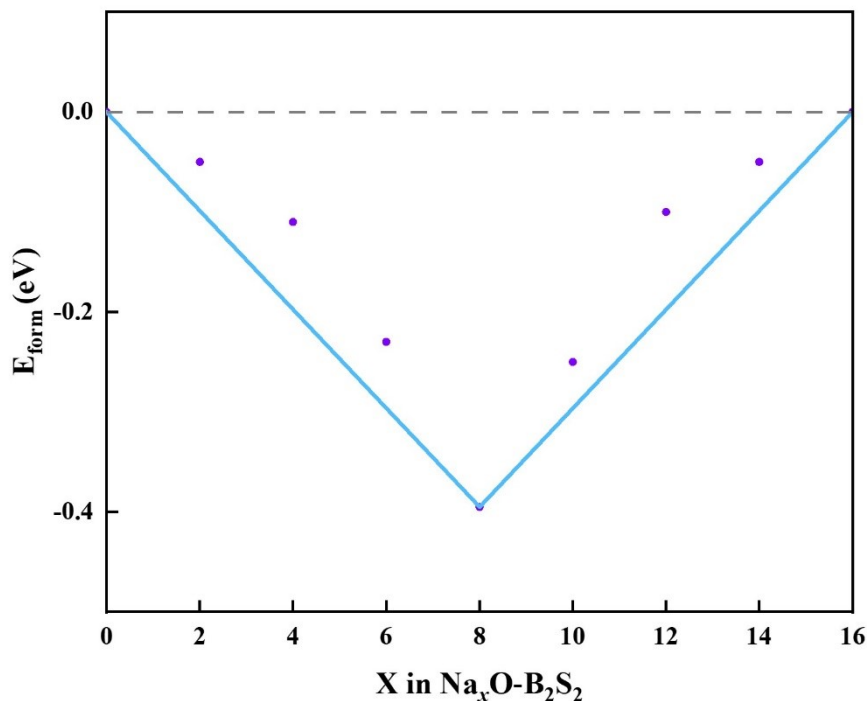

**Fig. S2** Normalized formation-energy landscape and approximate convex hull of  $\text{Na}_x\text{-O-B}_2\text{S}_2$ .

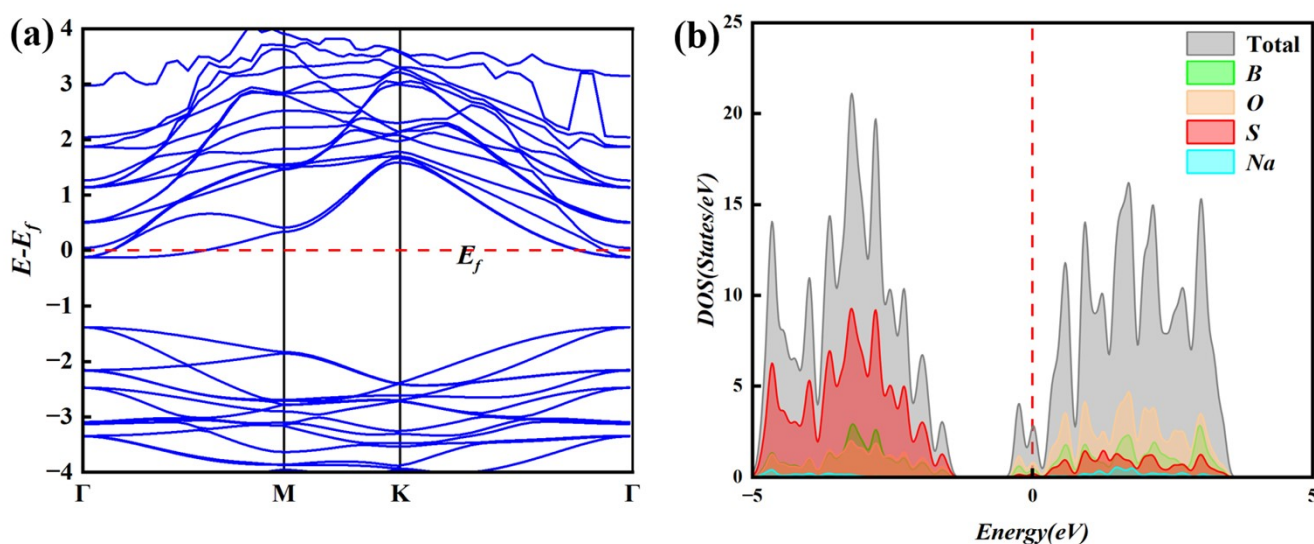

**Fig. S3** (a) Electronic band structure of the  $\text{O-B}_2\text{S}_2$  monolayer with a single Na atom adsorbed at the most stable Hollow site, calculated at the PBE level along the  $\Gamma\text{-M-K-}\Gamma$  path. (b) Corresponding total DOS, showing finite electronic states at the Fermi level (set to zero), indicating metallic behavior upon Na adsorption.

Thermodynamically stable phases (hull vertices) in the B-S-O chemical system obtained from the Materials Project database. The listed values correspond to formation energies per atom (relative to elemental reference states) reported by Materials Project, and the MP identifiers (MP id) are provided to enable reproducible reconstruction of the B-S-O convex hull used in this work.

**Table S1.** Thermodynamically stable phases forming the B-S-O convex hull (Materials Project reference data) used for the stability assessment of B<sub>2</sub>S<sub>2</sub>O.

| Stable phase                                 | formation energy<br>(eV/atom) | MP id      |
|----------------------------------------------|-------------------------------|------------|
| B                                            | 0                             | mp-160     |
| B <sub>2</sub> O <sub>3</sub>                | -2.798                        | mp-306     |
| B <sub>2</sub> S <sub>2</sub> O <sub>9</sub> | -2.166                        | mp-1019509 |
| B <sub>2</sub> S <sub>3</sub>                | -0.735                        | mp-1199451 |
| B <sub>6</sub> O                             | -0.805                        | mp-1346    |
| BS <sub>2</sub>                              | -0.73                         | mp-540668  |
| O <sub>2</sub>                               | 0                             | mp-12957   |
| S                                            | 0                             | mp-96      |
| S <sub>8</sub> O                             | -0.644                        | mp-27465   |
| SO <sub>2</sub>                              | -1.69                         | mp-27726   |
| SO <sub>3</sub>                              | -1.703                        | mp-2414    |

**Table S2.** In-plane lattice variation of O-B<sub>2</sub>S<sub>2</sub> upon Na adsorption

| Na loading            | a (Å)   | b (Å)   | γ(Å)   | Area change (%) |
|-----------------------|---------|---------|--------|-----------------|
| 0 Na (pristine)       | 6.17866 | 6.17863 | 120.00 | 0               |
| 16 Na (high coverage) | 6.59644 | 6.59435 | 120.01 | ~13.9           |
